# Supplementary material for: Microwave Treatments of Cereals: Effects on Thermophysical and Parenchymal-Related Properties
Source: PubMed Central journal article supplement (PMC7353526; doi:10.3390/foods9060711), 2020-06-01
Supplement: foods-09-00711-s001.pdf [file foods-09-00711-s001.pdf]

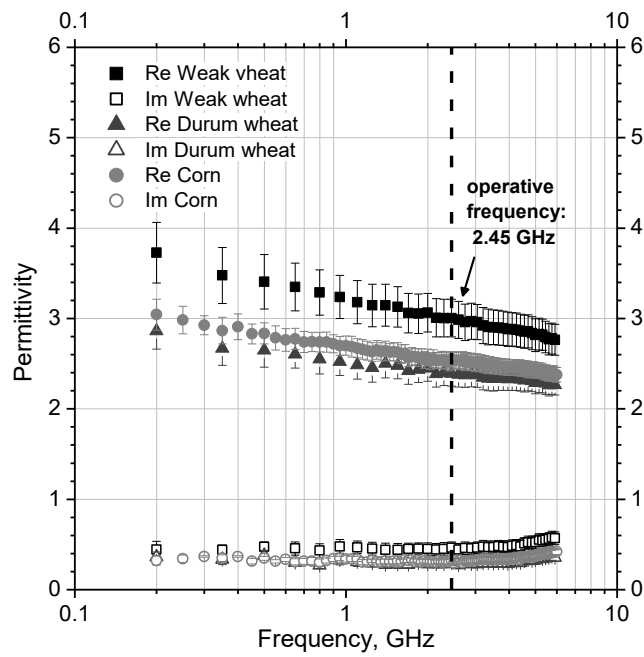

|                                            | Weak wheat | Durum wheat | Corn     |
|--------------------------------------------|------------|-------------|----------|
| <i>Moisture, wb% ± SD</i>                  | 10.6±0.3   | 6.3±0.4     | 10.5±0.2 |
| <i>Bulk density, kg/m<sup>3</sup> ± SD</i> | 570 ± 6    | 626 ± 6     | 527 ± 12 |

**Suppl Mat Figure 1.** Permittivity, i.e. dielectric constant (Re) and loss factor (Im) for milled weak wheat (closed and open squares, respectively), durum wheat (closed and open triangles, respectively), corn (closed and open circles, respectively), and moisture contents

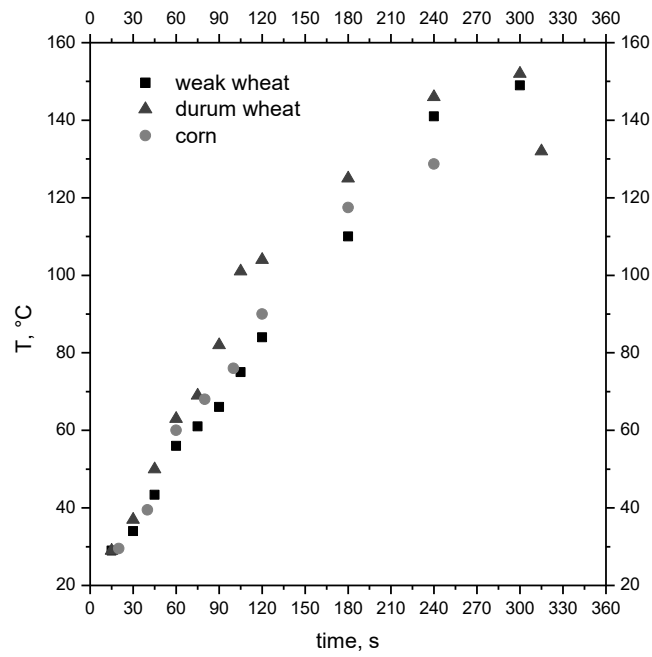

|                           | <b>Weak wheat</b> | <b>Durum wheat</b> | <b>Corn</b> |
|---------------------------|-------------------|--------------------|-------------|
| <i>Moisture, wb% ± SD</i> | 1.36 ± 0.01       | 1.24 ± 0.19        | 0.83 ± 0.19 |
| <i>EM times, s</i>        | 105               | 75                 | 100         |
| <i>UCM times, s</i>       | 315               | 225                | 300         |

**Suppl Mat Figure 2.** Behavior of surface temperature with time for weak wheat (squares), durum wheat (triangles), corn (circles), initial moisture contents, and both effective (EM) and uncontrolled (UCM) treatment times

A)

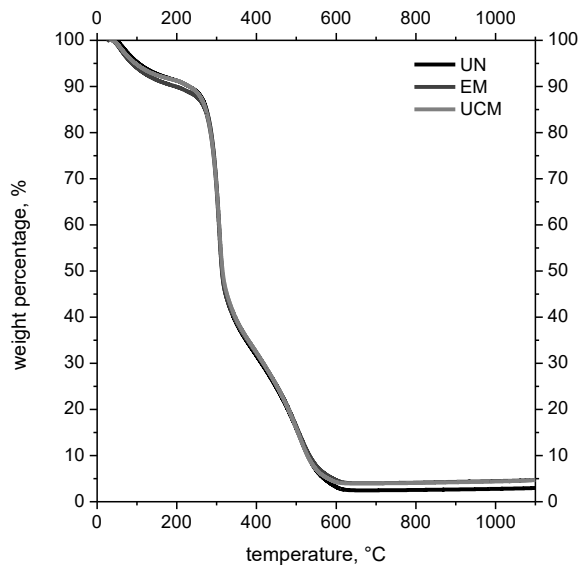

B)

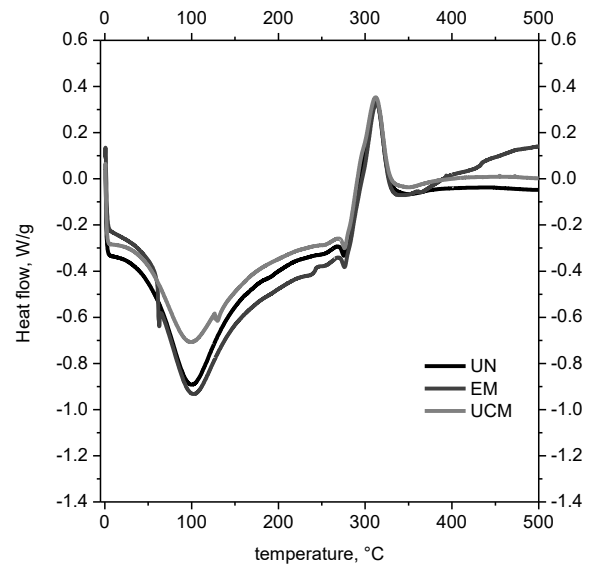

**Suppl Mat Figure 3.** TGA curves in presence of air in A) and DSC curves in B) for UN (black), EM (dark gray), and UCM (light gray) powdered samples of durum wheat
